# Supplementary material for: Nanoporous bimetallic Zn/Fe–N–C for efficient oxygen reduction in acidic and alkaline media
Source: Royal Society of Chemistry journal article supplement (doi:10.1039/c9ta13471a), 2020-01-01
Supplement: c9ta13471a1.pdf [file c9ta13471a1.pdf]

## Supporting Information

### Nanoporous bimetallic Zn/Fe-N-C for efficient oxygen reduction in acidic and alkaline media

Jinling Xue<sup>1</sup>, Yinshi Li<sup>1,\*</sup>, Jue Hu<sup>2,\*</sup>

<sup>1</sup>Key Laboratory of Thermo-Fluid Science and Engineering of Ministry of Education, School of Energy and Power Engineering, Xi'an Jiaotong University, Xi'an, Shaanxi 710049, China

<sup>2</sup>Faculty of Science, Kunming University of Science and Technology, Kunming, Yunnan, 650500, China

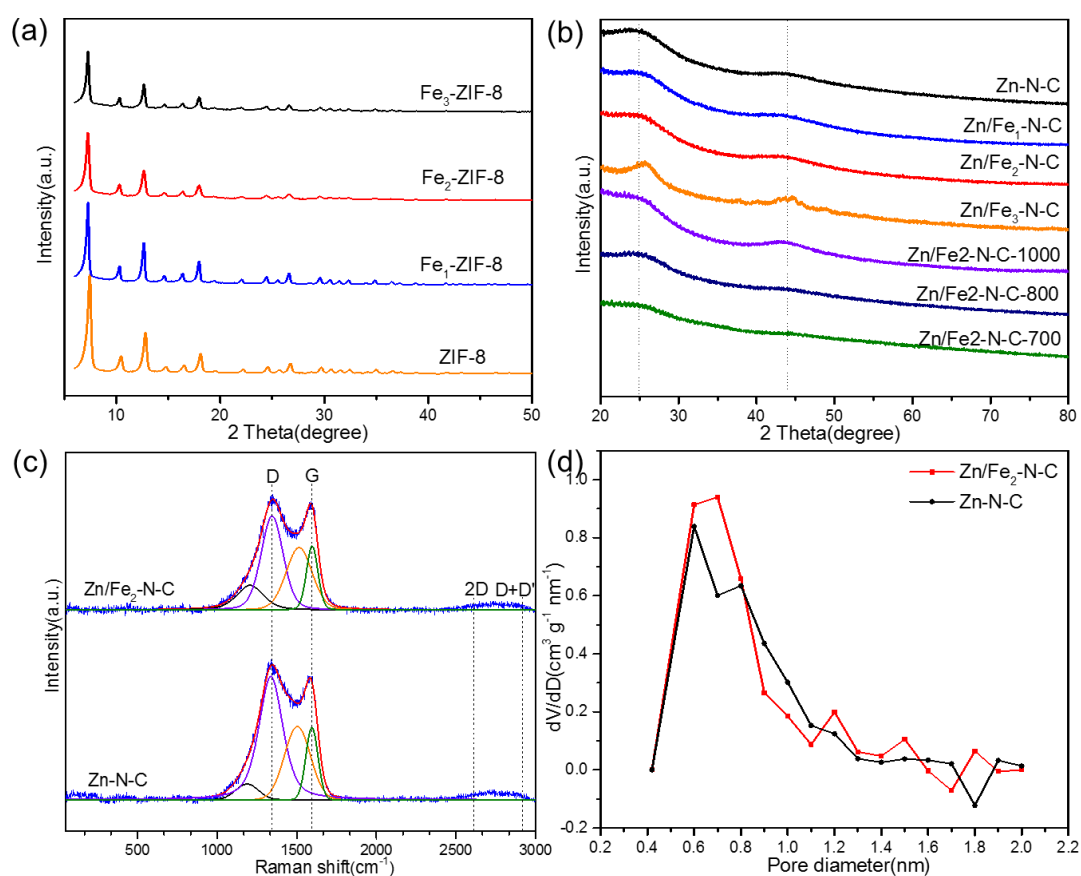

Fig. S1. (a) XRD pattern of pure ZIF-8, Fe<sub>x</sub>-ZIF-8 with different densities of hemin; (b) XRD pattern of as-prepared catalysts; (c) Raman spectra of Zn/Fe<sub>2</sub>-N-C and Zn-N-C; (d) micropore size distribution determined by H-K method of Zn/Fe<sub>2</sub>-N-C and Zn-N-C.

\*Corresponding author.

E-mail addresses: [ysli@mail.xjtu.edu.cn](mailto:ysli@mail.xjtu.edu.cn) (Y.L.); [hujue@kust.edu.cn](mailto:hujue@kust.edu.cn) (J.H.)

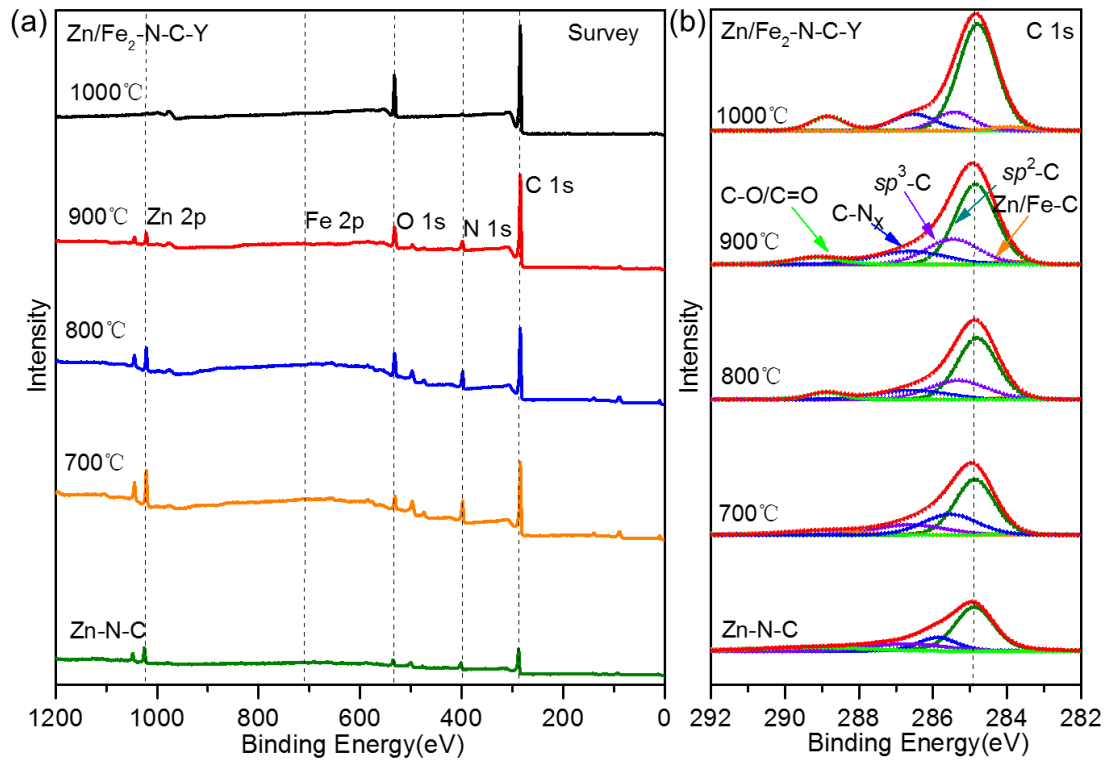

Fig. S2. (a) XPS survey spectrum and (b) high-resolution C 1s spectra of Zn/Fe<sub>2</sub>-N-C prepared at different annealing temperatures and spectra of Zn-N-C.

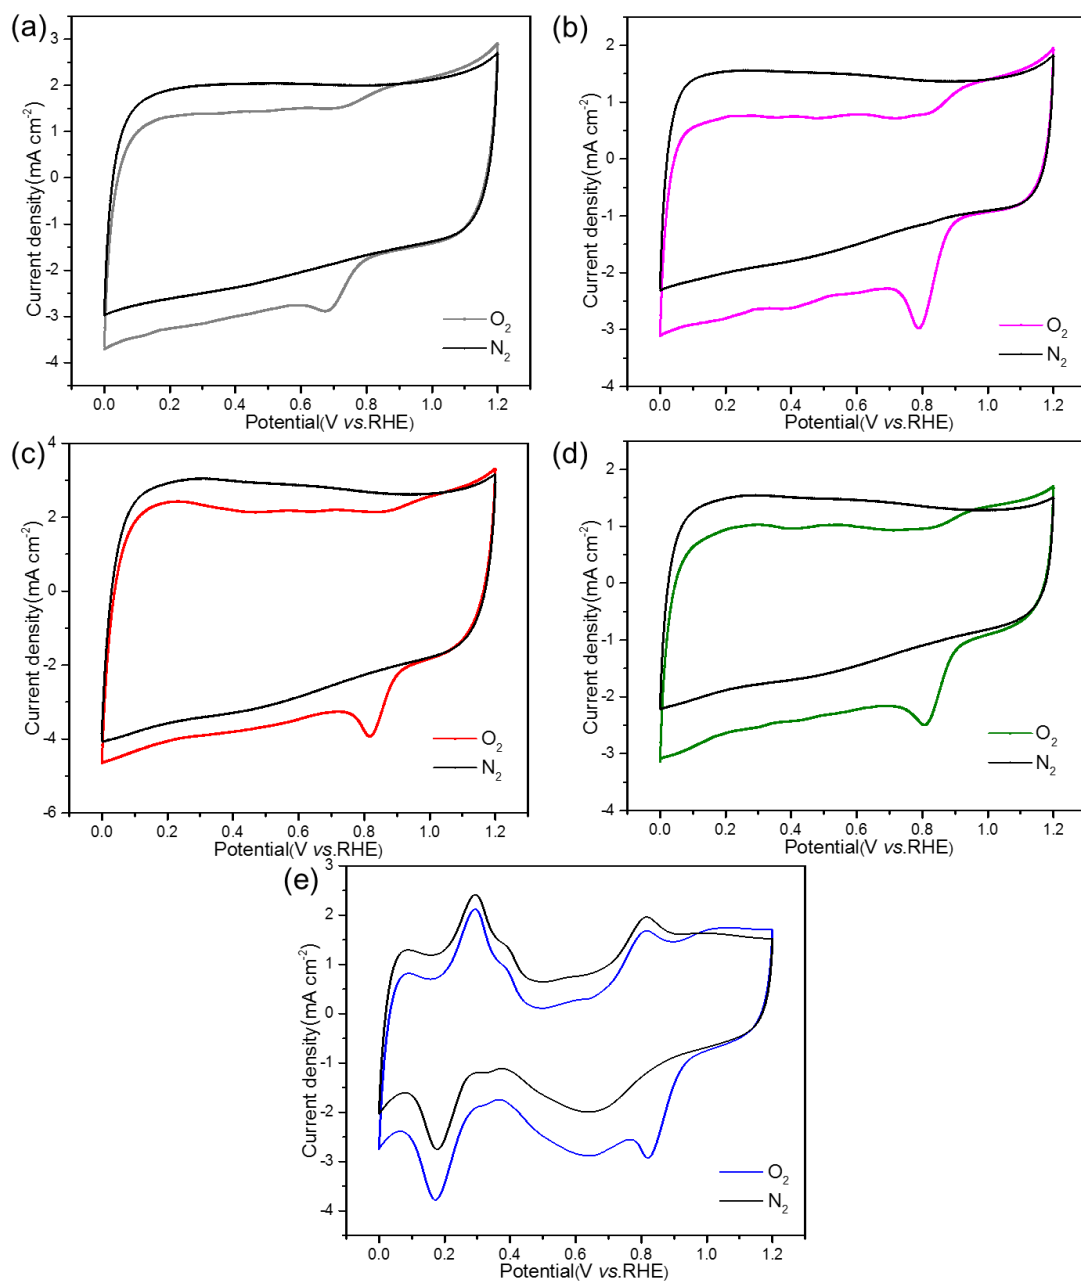

Fig. S3. CV curves of (a) Zn-N-C, (b) Zn/Fe<sub>1</sub>-N-C, (c) Zn/Fe<sub>2</sub>-N-C, (d) Zn/Fe<sub>3</sub>-N-C and (e) Pt/C in O<sub>2</sub>-saturated and N<sub>2</sub>-saturated 0.1 M KOH solution with cathodic peaks at 0.685, 0.798, 0.810, 0.836, and 0.835 V, respectively.

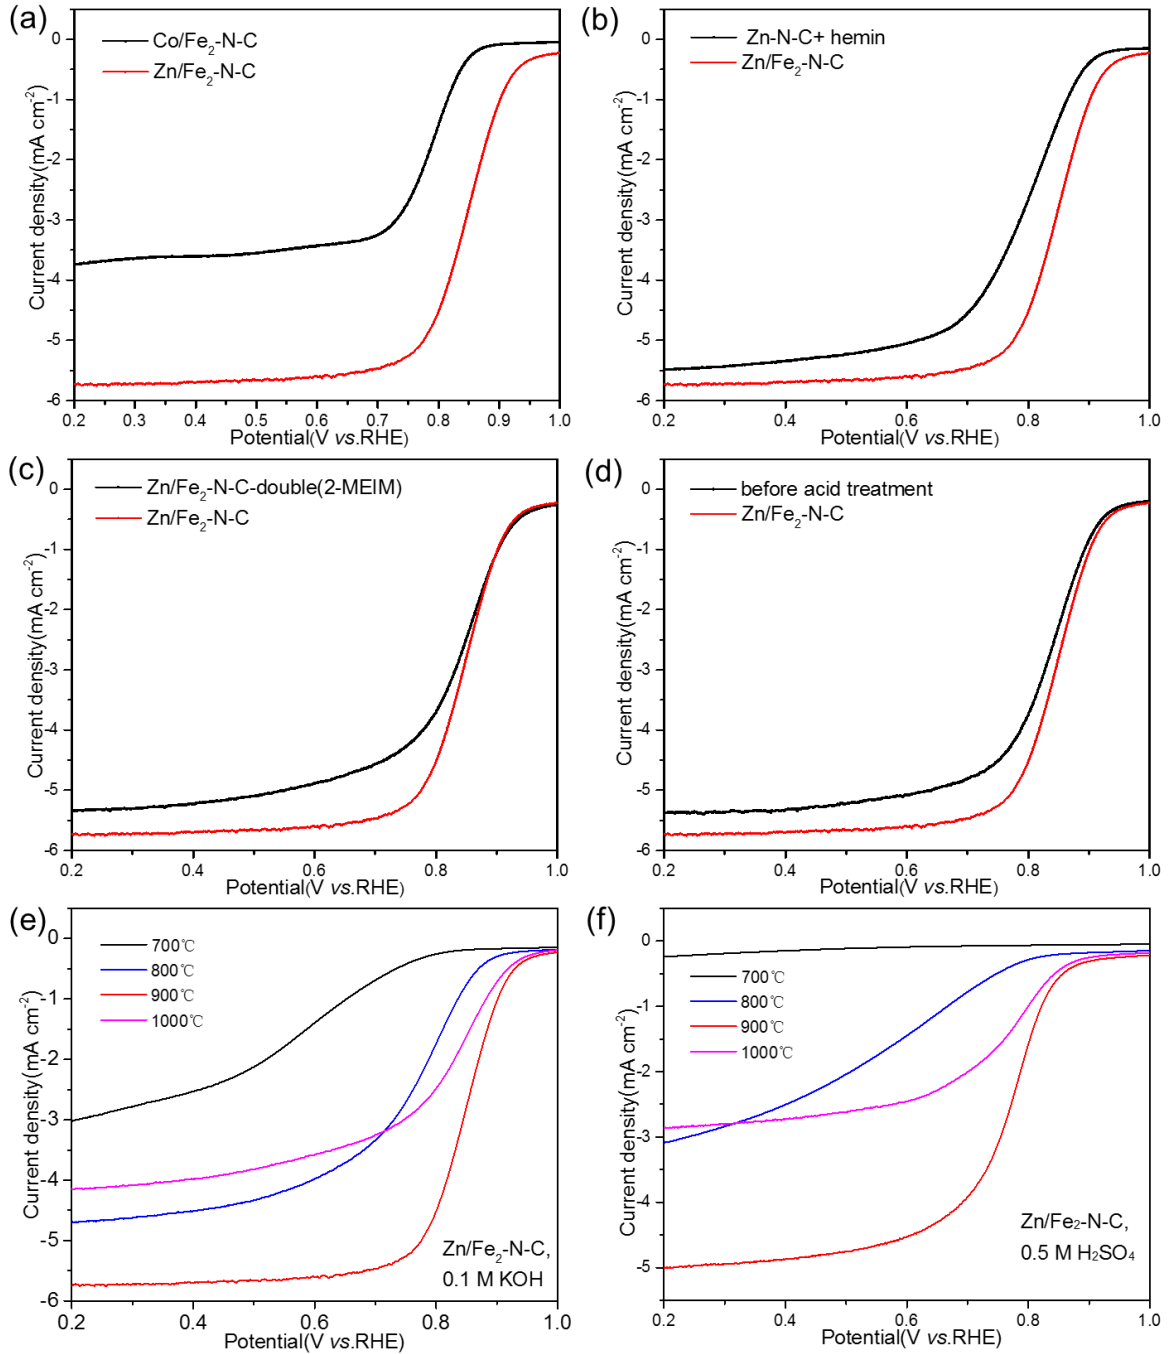

Fig. S4. (a-d) LSV curves of different preparation process catalysts in  $O_2$ -saturated 0.1 M KOH with a rotation rate of 1600 rpm; (e-f) LSV curves of Zn/Fe<sub>2</sub>-N-C prepared at different annealing temperatures in 0.1 M KOH and 0.5 M H<sub>2</sub>SO<sub>4</sub>

Table S1. Raman spectra parameters of Zn/Fe<sub>2</sub>-N-C and Zn-N-C samples.

| Samples                 | Carbon structures                                     |                       |                       |                       |                                               |
|-------------------------|-------------------------------------------------------|-----------------------|-----------------------|-----------------------|-----------------------------------------------|
|                         | <i>sp</i> <sup>2</sup> -C outside<br>graphene network | D-band                | Heteroatoms           | G-band                | <i>I</i> <sub>G</sub> / <i>I</i> <sub>D</sub> |
|                         | 1220 cm <sup>-1</sup>                                 | 1350 cm <sup>-1</sup> | 1500 cm <sup>-1</sup> | 1600 cm <sup>-1</sup> |                                               |
| Zn/Fe <sub>2</sub> -N-C | 14.39%                                                | 40.67%                | 30.97%                | 13.97%                | 0.34                                          |
| Zn-N-C                  | 4.21%                                                 | 54.02%                | 28.61%                | 13.16%                | 0.24                                          |

Table S2. Pore characteristics of Zn/Fe<sub>2</sub>-N-C and Zn-N-C samples.

| Samples                 | S <sub>BET</sub>      | V <sub>Micropore</sub> | V <sub>Mesopores</sub> | V <sub>Macropore</sub> | R <sub>p, peak</sub> |
|-------------------------|-----------------------|------------------------|------------------------|------------------------|----------------------|
|                         | (cm <sup>2</sup> / g) | (cm <sup>3</sup> / g)  | (cm <sup>3</sup> / g)  | (cm <sup>3</sup> / g)  | (nm)                 |
| Zn/Fe <sub>2</sub> -N-C | 772.65                | 0.3452                 | 0.3392                 | 0.1694                 | 34                   |
| Zn-N-C                  | 770.94                | 0.3172                 | 0.8959                 | 0                      | 19                   |

Table S3. Atomic percentage of the samples determined by XPS

| Samples                      | C 1s  | N 1s  | O 1s  | Fe 2p | Zn 2p |
|------------------------------|-------|-------|-------|-------|-------|
| Zn/Fe <sub>2</sub> -N-C-1000 | 83.88 | 1.25  | 14.62 | 0.09  | 0.16  |
| Zn/Fe <sub>2</sub> -N-C      | 80.79 | 7.16  | 9.74  | 0.25  | 2.06  |
| Zn/Fe <sub>2</sub> -N-C-800  | 73.04 | 11.32 | 10.31 | 0.18  | 4.19  |
| Zn/Fe <sub>2</sub> -N-C-700  | 71.87 | 15.25 | 6.69  | 0.08  | 6.11  |
| Zn-N-C                       | 74.86 | 13.36 | 8.08  | --    | 3.70  |

Table S4. XPS atomic percentage of different types of C of the applied samples

| Samples                      | C 1s    |                  |                    |                    |      |
|------------------------------|---------|------------------|--------------------|--------------------|------|
|                              | C-O/C=O | C-N <sub>x</sub> | sp <sup>3</sup> -C | sp <sup>2</sup> -C | C-Fe |
| Zn/Fe <sub>2</sub> -N-C-1000 | 8.07    | 11.72            | 11.59              | 66.47              | 2.15 |
| Zn/Fe <sub>2</sub> -N-C      | 5.84    | 15.79            | 22.45              | 54.38              | 1.54 |
| Zn/Fe <sub>2</sub> -N-C-800  | 5.25    | 14.40            | 24.75              | 54.51              | 1.09 |
| Zn/Fe <sub>2</sub> -N-C-700  | 8.09    | 15.84            | 25.57              | 49.56              | 0.94 |
| Zn-N-C                       | 8.14    | 19.57            | 20.61              | 51.68              | --   |

Table S5. XPS atomic percentage of different types of N of the applied samples

| Samples                      | N 1s       |             |            |         |             |
|------------------------------|------------|-------------|------------|---------|-------------|
|                              | Oxidized-N | Graphitic-N | Pyrrolic-N | Zn/Fe-N | Pyridinic-N |
| Zn/Fe <sub>2</sub> -N-C-1000 | 12.71      | 28.98       | 12.95      | 5.78    | 39.58       |
| Zn/Fe <sub>2</sub> -N-C      | 13.66      | 14.41       | 9.03       | 20.31   | 42.58       |
| Zn/Fe <sub>2</sub> -NC-800   | 2.38       | 3.34        | 22.54      | 12.11   | 59.63       |
| Zn/Fe <sub>2</sub> -NC-700   | 5.92       | 10.40       | 17.11      | 1.04    | 65.53       |
| Zn-N-C                       | 4.34       | 5.08        | 29.54      | 8.10    | 52.94       |

Table S6. A list of noble-metal ORR catalysts with derivative precursors showing preparation conditions, active sites and performance. The potentials below are relative to RHE.

| preparation conditions     |                                                                       |               |                                                                                            |                            |                                 | ORR performance                    |                        |                      |                                       |                   |                                      |     |
|----------------------------|-----------------------------------------------------------------------|---------------|--------------------------------------------------------------------------------------------|----------------------------|---------------------------------|------------------------------------|------------------------|----------------------|---------------------------------------|-------------------|--------------------------------------|-----|
| Catalysts                  | Precursors                                                            | Metal species | Synthesis routine                                                                          | Annealing temperature (°C) | Active sites                    | Cat loading [mg cm <sup>-2</sup> ] | E <sub>onset</sub> [V] | E <sub>1/2</sub> [V] | j <sub>L</sub> [mA cm <sup>-2</sup> ] | Testing conditons |                                      | Ref |
|                            |                                                                       |               |                                                                                            |                            |                                 |                                    |                        |                      |                                       | Alkaline media    | Acidic media                         |     |
| Fe-SilkPNC                 | Silk fibers or silk textile, FeCl <sub>3</sub> /ZnCl <sub>2</sub>     | Fe, Zn        | Silk fibroin precursor, programmed heating procedure, acidic leaching (HCl)                | 120 - 220 - 320 - 900      | Fe-N <sub>x</sub> -C            | 0.60                               | N.A.                   | 0.853                | 5.25                                  | 0.1 M KOH         | N.A.                                 | S1  |
| Fe-N <sub>x</sub> -C       | ZIF-8, FeSO <sub>4</sub> ·7H <sub>2</sub> O, 1,10-phenanthroline      | Fe, Zn        | Hydrothermal treatments, pyrolysis                                                         | 900                        | FeN <sub>x</sub>                | 0.31                               | 1.05                   | 0.91                 | 5.44                                  | 0.1 M KOH         | N.A.                                 | S2  |
| FeN <sub>x</sub> -PNC      | ZIF-8, graphene, pyrrole, FeCl <sub>3</sub> , bipyrodine              | Fe, Zn        | Two-step synthetic precursor, pyrolysis, acidic leaching (H <sub>2</sub> SO <sub>4</sub> ) | 1000                       | FeN <sub>x</sub>                | 0.14                               | 1.00                   | 0.86                 | 5.95                                  | 0.1 M KOH         | N.A.                                 | S3  |
| Fe <sub>0.5</sub> -N/CDC-2 | Carbide-derived carbon powders, 1,10-phenanthroline, iron(II) acetate | Fe, Ti, Zr    | Ball-milled, pyrolysis                                                                     | 800                        | FeN <sub>x</sub> C <sub>y</sub> | 0.80                               | N.A.                   | 0.81                 | 6.40                                  | N.A.              | 0.5 M H <sub>2</sub> SO <sub>4</sub> | S4  |
| 20Mn-NC-second             | Mn-doped ZIF-8, cyanamide                                             | Mn, Zn        | Calcination- acid etching (H <sub>2</sub> SO <sub>4</sub> ) - calcination                  | 900, 1100                  | MnN <sub>4</sub>                | 0.40                               | 0.96                   | 0.80                 | 3.85                                  | N.A.              | 0.5 M H <sub>2</sub> SO <sub>4</sub> | S5  |
| 20Co-NC-1100               | ZIF-8, Co(NO <sub>3</sub> ) <sub>2</sub> ·6H <sub>2</sub> O           | Co, Zn        | Pyrolysis                                                                                  | 1100                       | CoN <sub>4</sub>                | 0.80                               | 0.93 V, 0.1 mg/c       | 0.80                 | 4.20                                  | N.A.              | 0.5 M H <sub>2</sub> SO <sub>4</sub> | S6  |

|                           |                                                                                                                                           |        |                                                                                                  |           |                              |      |      |       |      |           |                                      | m <sup>2</sup> |
|---------------------------|-------------------------------------------------------------------------------------------------------------------------------------------|--------|--------------------------------------------------------------------------------------------------|-----------|------------------------------|------|------|-------|------|-----------|--------------------------------------|----------------|
| ZIF/MIL-10-900            | ZIF-8, MIL-101(Fe)                                                                                                                        | Fe, Zn | Two-MOF precursor synthetic, physical grinding mixture, pyrolysis, acidic leaching (HCl)         | 900       | FeN <sub>4</sub>             | 0.50 | N.A. | 0.78  | 5.90 | N.A.      | 0.1 M HClO <sub>4</sub>              | S7             |
| Fe-N-C                    | ZIF-8, Fe(acac) <sub>3</sub>                                                                                                              | Fe, Zn | Pyrolysis, acidic leaching (HCl)                                                                 | 950       | FeN <sub>4</sub>             | 0.40 | 0.92 | 0.78  | 5.80 | N.A.      | 0.1 M HClO <sub>4</sub>              | S8             |
| Fe, N-HPCC                | FeSO <sub>4</sub> ·7H <sub>2</sub> O, Zn(NO <sub>3</sub> ) <sub>2</sub> ·6H <sub>2</sub> O, benzimidazole                                 | Fe, Zn | Pyrolysis                                                                                        | 1000      | FeN <sub>4</sub>             | 0.79 | 0.97 | 0.90  | 5.50 | 0.1 M KOH | 0.1 M HClO <sub>4</sub>              | S9             |
| Fe <sub>SA</sub> -N-C     | 20% Fe-TCPP, 80% H <sub>2</sub> -TCPP, Zr <sup>4+</sup>                                                                                   | Fe, Zr | Two-MOF precursor synthetic, pyrolysis, acidic leaching (HF)                                     | 800       | FeN <sub>4</sub>             | 0.28 | 1.00 | 0.89  | 6.00 | 0.1 M KOH | 0.1 M HClO <sub>4</sub>              | S10            |
| C-FeZIF-1.44-950          | ZIF-8, ferrocene                                                                                                                          | Fe, Zn | Physical mixture, pyrolysis, acidic leaching (H <sub>2</sub> SO <sub>4</sub> ), second pyrolysis | 950       | FeN <sub>x</sub>             | 0.50 | 0.99 | 0.86  | 6.35 | 0.1 M KOH | 0.1 M HClO <sub>4</sub>              | S11            |
| Fe <sub>3</sub> C@NP-PCFs | 3D polyvinylpyrrolidone (PVP), cyanamide, Fe(C <sub>2</sub> H <sub>3</sub> O <sub>2</sub> ) <sub>2</sub> , H <sub>3</sub> PO <sub>4</sub> | Fe     | Fe <sub>3</sub> C@NP-PCFs homogeneous precursor solution, precursor membranes, pyrolysis         | 800       | Fe <sub>3</sub> C, Fe-P, P-C | 0.46 | 0.90 | 0.80  | 5.68 | 0.1 M KOH | 0.5 M H <sub>2</sub> SO <sub>4</sub> | S12            |
| N-HPCNSs-800              | Water hyacinth                                                                                                                            |        | Two-step pyrolysis, acidic leaching (HCl)                                                        | 500 - 800 | Pyridinic-, graphitic-       | N.A. | 1.00 | 0.887 | 6.15 | 0.1 M KOH |                                      | S13            |

|             |                                                                                                         |    |                                                                                                   |                 |                                     |       |       |       |      |              |                                         |     |
|-------------|---------------------------------------------------------------------------------------------------------|----|---------------------------------------------------------------------------------------------------|-----------------|-------------------------------------|-------|-------|-------|------|--------------|-----------------------------------------|-----|
|             |                                                                                                         |    |                                                                                                   |                 | N                                   |       | 0.858 | 0.75  | 6.36 |              | 0.5 M<br>H <sub>2</sub> SO <sub>4</sub> |     |
| P12-900     | Ethylenedioxythiophene, FeCl <sub>3</sub> ·6H <sub>2</sub> O                                            | Fe | Pyrolysis, acidic leaching (H <sub>2</sub> SO <sub>4</sub> ), second pyrolysis                    | 900             | FeS <sub>x</sub> , FeN <sub>x</sub> | 0.50  | 1.016 | 0.86  | 7.20 | 0.1 M<br>KOH |                                         | S14 |
|             |                                                                                                         |    |                                                                                                   |                 |                                     |       | 0.92  | 0.78  | 5.70 |              | 0.5 M<br>H <sub>2</sub> SO <sub>4</sub> |     |
| HCS-A       | Polyaniline, polypyrrole, triton X-100, Fe(CH <sub>3</sub> COO) <sub>2</sub> , pyrrole, aminothiophenol | Fe | Three-step pyrolysis                                                                              | 400 - 800 - 900 | FeN <sub>x</sub>                    | 0.50  | N.A.  | 0.87  | 4.70 | 0.1 M<br>KOH |                                         | S15 |
|             |                                                                                                         |    |                                                                                                   |                 |                                     |       |       | 0.75  | 4.30 |              | 0.5 M<br>H <sub>2</sub> SO <sub>4</sub> |     |
| PBE2PB      | Fe(NO <sub>3</sub> ) <sub>2</sub> , nicarbazin, Stöber spheres, fumed silica, fumed silica              | Fe | Batch, 1st pyrolysis, 1st ball milling, acidic leaching (HF and NNO <sub>3</sub> ), 2nd pyrolysis | 975             | FeN <sub>x</sub>                    | 0.175 | N.A.  | 0.825 | 4.35 | 0.1 M<br>KOH |                                         | S16 |
|             |                                                                                                         |    |                                                                                                   |                 |                                     |       |       | 0.70  | 3.80 |              | 0.5 M<br>H <sub>2</sub> SO <sub>4</sub> |     |
| Fe-N-DSC    | FeCl <sub>3</sub> ·6H <sub>2</sub> O, ammonium acetate, pyrrole                                         | Fe | Solvothermal reaction, pyrolysis                                                                  | 900             | FeN <sub>x</sub>                    | 0.102 | 1.03  | 0.84  | 4.50 | 0.1 M<br>KOH |                                         | 17  |
|             |                                                                                                         |    |                                                                                                   |                 |                                     |       | 0.81  | 0.65  | 4.50 |              | 0.5 M<br>H <sub>2</sub> SO <sub>4</sub> |     |
| Fe-SN-C@800 | FeCl <sub>3</sub> , methyl orange                                                                       | Fe | Pyrolysis, acidic leaching (HCl)                                                                  | 800             | FeN <sub>x</sub>                    | 0.180 | 0.935 | 0.848 | 4.60 | 0.1 M<br>KOH |                                         | S18 |
|             |                                                                                                         |    |                                                                                                   |                 |                                     |       | 0.747 | 0.640 | 3.60 |              | 0.5 M<br>H <sub>2</sub> SO <sub>4</sub> |     |
| Fe/N/S-CNT  | FeCl <sub>3</sub> , methyl orange pyrrole                                                               | Fe | Pyrolysis, acidic leaching (HCl)                                                                  | 800             | Fe-N-C, C-S-C                       | 0.10  | 0.96  | 0.84  | 5.00 | 0.1 M<br>KOH |                                         | S19 |
|             |                                                                                                         |    |                                                                                                   |                 |                                     |       | 0.80  | 0.62  | 4.60 |              | 0.5 M                                   |     |



|                 |                                                                          |            |                                                         |      |                                            |       |      |       |      |           |                               |     |
|-----------------|--------------------------------------------------------------------------|------------|---------------------------------------------------------|------|--------------------------------------------|-------|------|-------|------|-----------|-------------------------------|-----|
| D-PC-1(900)     | Sodium alginate, $\text{NH}_3 \cdot \text{H}_2\text{O}$                  |            | Solvothermal reaction, acidic dialysis (HCl), pyrolysis | 900  | N-doping-removal                           | 0.40  | 1.01 | 0.827 | 5.43 | 0.1 M KOH | $\text{H}_2\text{SO}_4$       | S20 |
|                 |                                                                          |            |                                                         |      |                                            |       | 0.82 | 0.60  | 4.60 |           | 0.5 M $\text{H}_2\text{SO}_4$ |     |
| B,N-carbon      | $\text{ZnCl}_2$ , ethyl cellulose, 4-(1-naphthyl)benzeneboronic acid     | Zn         | Pyrolysis, acidic leaching (HCl)                        | 800  | $\text{BN}_x$                              | 0.146 | 0.98 | 0.84  | 5.50 | 0.1 M KOH |                               | S21 |
|                 |                                                                          |            |                                                         |      |                                            |       | 0.81 | 0.52  | N.A. |           | 0.5 M $\text{H}_2\text{SO}_4$ |     |
| N/3D-GNS        | Graphene oxide, Cab-O-Sil L90                                            |            | Thermal reduction, etching, pyrolysis                   | 850  | Graphitic-, hydrogenated- and pyridinic-N  | 0.20  | 0.90 | 0.80  | 208  | 0.1 M KOH |                               | S22 |
|                 |                                                                          |            |                                                         |      |                                            |       | 0.71 | 0.51  | N.A. |           | 0.5 M $\text{H}_2\text{SO}_4$ |     |
| 1MIL/40ZIF-1000 | ZIF-8, MIL-100(Fe)                                                       | Fe, Zn     | Pyrolysis, acidic leaching ( $\text{H}_2\text{SO}_4$ )  | 1000 | Fe- $\text{Fe}_3\text{C}$ , $\text{FeN}_x$ | 0.50  | 1.07 | 0.88  | 4.66 | 0.1 M KOH |                               | S23 |
|                 |                                                                          |            |                                                         |      |                                            |       | 0.93 | 0.79  | 4.38 |           | 0.5 M $\text{H}_2\text{SO}_4$ |     |
| Fe-N-S CNN      | ZIF-8, $\text{FeSO}_4$ , $\text{N}_2\text{H}_4 \cdot \text{H}_2\text{O}$ | Fe, Zn     | Pyrolysis                                               | 900  | $\text{FeN}_x$ , C-S-C                     | N.A.  | N.A. | 0.91  | 5.75 | 0.1 M KOH |                               | S24 |
|                 |                                                                          |            |                                                         |      |                                            |       |      | 0.78  | 6.00 |           | 0.5 M $\text{H}_2\text{SO}_4$ |     |
| Cu@Fe-N-C       | ZIF-8, copper foil, $\text{Fe}(\text{NO}_3)_3 \cdot 9\text{H}_2\text{O}$ | Fe, Cu, Zn | Pyrolysis                                               | 900  | Fe/Cu- $\text{N}_x$                        | 0.50  | 1.01 | 0.89  | 5.75 | 0.1 M KOH |                               | S25 |
|                 |                                                                          |            |                                                         |      |                                            |       | 0.88 | 0.76  | 5.20 |           | 0.5 M                         |     |

|                         |                                                                 |        |                                                       |     |                             |       |       |       |      |           |                                      |           |
|-------------------------|-----------------------------------------------------------------|--------|-------------------------------------------------------|-----|-----------------------------|-------|-------|-------|------|-----------|--------------------------------------|-----------|
| Fe/N/S-CNTs             | ZIF-8, FeSO <sub>4</sub> ·7H <sub>2</sub> O, hydrazine hydrate, | Fe, Zn | Pyrolysis, acidic leaching (HCl)                      | 900 | FeN <sub>x</sub> , C-S-C    | 0.815 | 0.987 | 0.887 | 6.00 | 0.1 M KOH | H <sub>2</sub> SO <sub>4</sub>       | S26       |
|                         |                                                                 |        |                                                       |     |                             |       | N.A.  | 0.767 | 5.85 |           | 0.5 M H <sub>2</sub> SO <sub>4</sub> |           |
| Fe/S-NC                 | ZIF-8, FeCl <sub>3</sub> , KSCN                                 | Fe, Zn | Pyrolysis-adsorption-pyrolysis, acidic leaching (HCl) | 900 | Fe-N <sub>x</sub> -C, C-S-C | 0.764 | 1.003 | 0.859 | 4.40 | 0.1 M KOH |                                      | S27       |
|                         |                                                                 |        |                                                       |     |                             |       | 0.877 | 0.757 | 4.30 |           | 0.5 M H <sub>2</sub> SO <sub>4</sub> |           |
| NPSpC                   | ZIF-8, sodium phytate, dodecyl mercaptan                        | Zn     | Pyrolysis                                             | 900 | N, P and S -doping          | N.A.  | 0.923 | 0.821 | 4.40 | 0.1 M KOH |                                      | S28       |
|                         |                                                                 |        |                                                       |     |                             |       | 0.899 | 0.757 | 4.60 |           | 0.5 M H <sub>2</sub> SO <sub>4</sub> |           |
| ES-CNC <sub>Co</sub> -5 | ZIF-8, ZIF-67                                                   | Zn, Co | Electrospinning, pyrolysis                            | 800 | CoN <sub>x</sub>            | 0.30  | 0.79  | 0.71  | 4.82 | 0.1 M KOH |                                      | S29       |
|                         |                                                                 |        |                                                       |     |                             |       | 0.73  | 0.64  | 4.25 |           | 0.5 M H <sub>2</sub> SO <sub>4</sub> |           |
| MSZIF-900               | ZIF-67, melamine sponge                                         | Co     | Pyrolysis                                             | 900 | CoN <sub>x</sub>            | 0.286 | 0.91  | 0.84  | 5.00 | 0.1 M KOH |                                      | S30       |
|                         |                                                                 |        |                                                       |     |                             |       | 0.92  | 0.72  | 3.50 |           | 0.5 M H <sub>2</sub> SO <sub>4</sub> |           |
| Zn/Fe <sub>2</sub> -N-C | ZIF-8, hemin                                                    | Fe, Zn | Pyrolysis                                             | 900 | FeN <sub>x</sub>            | 0.34  | 1.08  | 0.86  | 5.67 | 0.1 M KOH |                                      | This work |
|                         |                                                                 |        |                                                       |     |                             |       | 1.06  | 0.81  | 4.90 |           | 0.5 M H <sub>2</sub> SO <sub>4</sub> |           |

Note: "-" represents being not available in the references.

## References

1. C. Wang, W. Chen, K. Xia, N. Xie, H. Wang and Y. Zhang, *Small*, 2019, **15**, 1804966-1804971.
2. J. Han, X. Meng, L. Lu, J. Bian, Z. Li and C. Sun, *Adv. Funct. Mater.*, 2019, **29**, 1808872-1808879.
3. L. Ma, S. Chen, Z. Pei, Y. Huang, G. Liang, F. Mo, Q. Yang, J. Su, Y. Gao, J. A. Zapien and C. Zhi, *ACS Nano*, 2018, **12**, 1949-1958.
4. S. Ratso, N. Ranjbar Sahraie, M. T. Sougrati, M. Käärrik, M. Kook, R. Saar, P. Paiste, Q. Jia, J. Leis, S. Mukerjee, F. Jaouen and K. Tammeveski, *J. Mater. Chem. A*, 2018, **6**, 14663-14674.
5. J. Li, M. Chen, D. A. Cullen, S. Hwang, M. Wang, B. Li, K. Liu, S. Karakalos, M. Lucero, H. Zhang, C. Lei, H. Xu, G. E. Sterbinsky, Z. Feng, D. Su, K. L. More, G. Wang, Z. Wang and G. Wu, *Nat. Catal.*, 2018, **1**, 935-945.
6. X. X. Wang, D. A. Cullen, Y. T. Pan, S. Hwang, M. Wang, Z. Feng, J. Wang, M. H. Engelhard, H. Zhang, Y. He, Y. Shao, D. Su, K. L. More, J. S. Spendelow and G. Wu, *Adv Mater*, 2018, **30**, 1706758-1706768.
7. X. Xu, Z. Xia, X. Zhang, R. Sun, X. Sun, H. Li, C. Wu, J. Wang, S. Wang and G. Sun, *Appl. Catal. B: Envir.*, 2019, **259**, 118042-118050.
8. M. Xiao, J. Zhu, L. Ma, Z. Jin, J. Ge, X. Deng, Y. Hou, Q. He, J. Li, Q. Jia, S. Mukerjee, R. Yang, Z. Jiang, D. Su, C. Liu and W. Xing, *ACS Catal.*, 2018, **8**, 2824-2832.
9. Z. Guo, Z. Zhang, Z. Li, M. Dou and F. Wang, *Nano Energy*, 2019, **57**, 108-117.
10. L. Jiao, G. Wan, R. Zhang, H. Zhou, S. H. Yu and H. L. Jiang, *Angew. Chem. Int. Ed.*, 2018, **57**, 8525-8529.
11. Y. Deng, B. Chi, J. Li, G. Wang, L. Zheng, X. Shi, Z. Cui, L. Du, S. Liao, K. Zang, J. Luo, Y. Hu and X. Sun, *Adv. Energy Mater.*, 2019, **9**, 1802856-1802863.
12. M. Li, Y. Liu, L. Han, J. Xiao, X. Zeng, C. Zhang, M. Xu, P. Dong and Y. Zhang, *J. Mater. Chem. A*, 2019, **7**, 17923-17936.
13. L. Liu, G. Zeng, J. Chen, L. Bi, L. Dai and Z. Wen, *Nano Energy*, 2018, **49**, 393-402.
14. S. N. Bhange, S. M. Unni and S. Kurungot, *ACS Appl. Energy Mater.*, 2018, **1**, 368-376.
15. P. Xu, J. Zhang, G. Jiang, F. Hassan, J. Choi, X. Fu, P. Zamani, L. Yang, D. Banham, S. Ye and Z. Chen, *Nano Energy*, 2018, **51**, 745-753.
16. K. Artyushkova, S. RojasCarbonell, C. Santoro, E. Weiler, A. Serov, R. Awais, R. R. Gokhale and P. Atanassov, *ACS Appl. Energy Mater.*, 2019, **2**, 5406-5418.
17. Z. Huang, H. Pan, W. Yang, H. Zhou, N. Gao, C. Fu, S. Li, H. Li and Y. Kuang, *ACS Nano*, 2018, **12**, 208-216.
18. J. Tong, W. Li, J. Ma, W. Wang, L. Bo, Z. Lei and A. Mahboob, *ACS Appl. Energy Mater.*, 2018, **1**, 5746-5754.
19. Z. Tan, H. Li, Q. Feng, L. Jiang, H. Pan, Z. Huang, Q. Zhou, H. Zhou, S. Ma and Y. Kuang, *J. Mater. Chem. A*, 2019, **7**, 1607-1615.
20. Y. Hao, X. Zhang, Q. Yang, K. Chen, J. Guo, D. Zhou, L. Feng and Z. Slanina, *Carbon*, 2018, **137**, 93-103.
21. T. Sun, J. Wang, C. Qiu, X. Ling, B. Tian, W. Chen and C. Su, *Adv. Sci.*, 2018, **5**, 1800036-1800044.
22. S. Kabir, K. Artyushkova, A. Serov and P. Atanassov, *ACS Appl. Mater. Inter.*, 2018, **10**, 11623-11632.
23. H. Wang, F. X. Yin, N. Liu, R. H. Kou, X. B. He, C. J. Sun, B. H. Chen, D. J. Liu and H. Q. Yin, *Adv. Funct. Mater.*, 2019, **29**, 1901531-1901541.
24. H. Jin, H. Zhou, D. He, Z. Wang, Q. Wu, Q. Liang, S. Liu and S. Mu, *Appl. Catal. B: Envir.*, 2019, **250**, 143-149.
25. Z. Wang, H. Jin, T. Meng, K. Liao, W. Meng, J. Yang, D. He, Y. Xiong and S. Mu, *Adv. Funct. Mater.*, 2018, **28**, 1802596-1802603.
26. H. Jin, H. Zhou, W. Li, Z. Wang, J. Yang, Y. Xiong, D. He, L. Chen and S. Mu, *J. Mater. Chem. A*, 2018, **6**, 20093-20099.
27. P. Zhang, C. Chen, X. Zhang, Z. Jiang, J. Huang and J. Chen, *Electrochim. Acta*, 2019, **298**, 570-579.

28. H. Rong, T. Zhan, Y. Sun, Y. Wen, X. Liu and H. Teng, *Electrochim. Acta*, 2019, **318**, 783-793.
29. C. Zhang, B. Lu, F. Cao, Z. Wu, W. Zhang, H. Cong and S. Yu, *Nano Energy*, 2019, **55**, 226-233.
30. G. Jia, W. Zhang, G. Fan, Z. Li, D. Fu, W. Hao, C. Yuan and Z. Zou, *Angew. Chem. Int. Ed.*, 2017, **56**, 13781-13785.
